# Supplementary material
Source: PubMed Central journal article supplement (PMC3020008)
Supplement: supp_85_2_742__1.pdf [file supp_85_2_742__1.pdf]

**Table S1.** Overview on the activity of primate lentiviral Nef proteins in selected assays and the presence of a *vpu* gene.

| Virus   | Species/subspecies                                             | Nef function |       |     |      |       |      | <i>vpu</i> | Teth-Ant.      |
|---------|----------------------------------------------------------------|--------------|-------|-----|------|-------|------|------------|----------------|
|         |                                                                | CD4          | MHC-I | CD3 | CD28 | Repl. | Inf. |            |                |
| HIV-1 M | Human ( <i>Homo sapiens</i> )                                  | +++          | ++    | -   | (+)  | ++    | ++   | +          | Vpu            |
| HIV-1 O | Human ( <i>Homo sapiens</i> )                                  | +++          | ++    | -   | (+)  | ++    | ++   | +          | ?*             |
| HIV-1 N | Human ( <i>Homo sapiens</i> )                                  | +++          | ++    | -   | (+)  | ++    | ++   | +          | Vpu            |
| SIVcpz  | centrl West. Chimpanzee ( <i>Pan troglodytes troglodytes</i> ) | +++          | ++    | -   | +    | ++    | ++   | +          | Nef            |
| SIVcpz  | Eastern Chimpanzee ( <i>Pan troglodytes schweinfurthii</i> )   | +++          | ++    | -   | +    | ++    | ++   | +          | Nef            |
| SIVgor  | Western lowland gorilla ( <i>Gorilla gorilla gorilla</i> )     | +++          | ++    | -   | +    | ++    | ++   | +          | Nef            |
| SIVgsn  | Greater spot-nosed monkey ( <i>Cercopithecus nictitans</i> )   | +++          | ++    | -   | +    | ++    | +++  | +          | Vpu            |
| SIVmus  | Mustached monkey ( <i>Cercopithecus cephus</i> )               | +++          | ++    | -   | (+)  | ++    | ++   | +          | Vpu            |
| SIVmon  | Mona monkey ( <i>Cercopithecus mona</i> )                      | +++          | ++    | -   | +    | ++    | +++  | +          | Vpu            |
| SIVden  | Dent's Mona monkey ( <i>Cercopithecus mona denti</i> )         | ++           | ++    | +   | +    | +     | ++   | +          | Vpu            |
| SIVrcm  | Red-capped mangabey ( <i>Cercocebus torquatus</i> )            | +++          | (+)   | +   | -    | ++    | ++   | -          | Nef            |
| HIV-2   | Human ( <i>Homo sapiens</i> )                                  | +++          | ++    | ++  | ++   | +     | ++   | -          | Env#           |
| SIVsmm  | Sooty mangabey ( <i>Cercocebus atys</i> )                      | +++          | ++    | ++  | ++   | ++    | +++  | -          | Nef            |
| SIVmac  | Rhesus macaque ( <i>Maccaca mulatta</i> )                      | +++          | ++    | ++  | ++   | ++    | +++  | -          | Nef            |
| SIVdeb  | De Brazza monkey ( <i>Cercopithecus neglectus</i> )            | ++           | +     | +++ | ++   | +++   | +++  | -          | n.d.           |
| SIVsyk  | Sykes' monkey ( <i>Cercopithecus albogularis</i> )             | +++          | +     | ++  | ++   | ++    | ++   | -          | n.d.           |
| SIVasc  | Red-tailed monkey ( <i>Cercopithecus ascanius</i> )            | +++          | ++    | ++  | ++   | +     | -    | -          | ? <sup>+</sup> |
| SIVblu  | Blue monkey ( <i>Cercopithecus mitis</i> )                     | +++          | ++    | +++ | +++  | ++    | ++   | -          | n.d.           |
| SIVsun  | Sun-tailed monkey ( <i>Cercopithecus solatus</i> )             | ++           | +     | +++ | +    | ++    | ++   | -          | n.d.           |
| SIVlho  | L'Hoest monkeys ( <i>Cercopithecus lhoesti</i> )               | ++           | +     | ++  | +    | ++    | ++   | -          | Nef            |
| SIVtan  | Tantalus monkey ( <i>Chlorocebus tantalus</i> )                | +++          | ++    | +++ | +++  | ++    | ++   | -          | Nef            |
| SIVagm  | Green monkey ( <i>Chlorocebus sabaesus</i> )                   | ++           | ++    | +++ | +++  | ++    | ++   | -          | Nef/Env        |
| SIVgri  | Grivet monkey ( <i>Chlorocebus aethiops</i> )                  | ++           | ++    | +++ | ++   | ++    | +    | -          | Nef            |
| SIVwrc  | Western Red Colobus ( <i>Piliocolobus badius</i> )             | +++          | ++    | +++ | +++  | ++    | ++   | -          | Nef            |
| SIVolc  | Olive Colobus ( <i>Procolobus verus</i> )                      | +++          | ++    | -   | +    | ++    | ++   | -          | Nef            |

Activity was measured by FACS or in *in vitro* assays for viral infectivity and replication as described (39, 51). Abbreviations: +++, high; ++, moderate; +, weak; (+) marginal and -, no activity; Repl., replication; Inf., infectivity; Teth-Ant.; tetherin antagonist. The properties of the indicated primate lentiviral Nef proteins and other tetherin antagonists are described in the present study or have been described previously (26, 39, 48, 51, 45, 11, 63, 64). Note that the data are preliminary because for some species only a very limited number of *nef* alleles has been analyzed and because most data were generated in human-derived cells. \*HIV-1 O Vpus and Nefs do not antagonize tetherin (48, 63) but it remains to be clarified whether they counteract this restriction factor by a different mechanism. #Only shown for HIV-2 group A Nef. <sup>+</sup>The SIVasc Nef has not been tested with tetherin from its natural host.

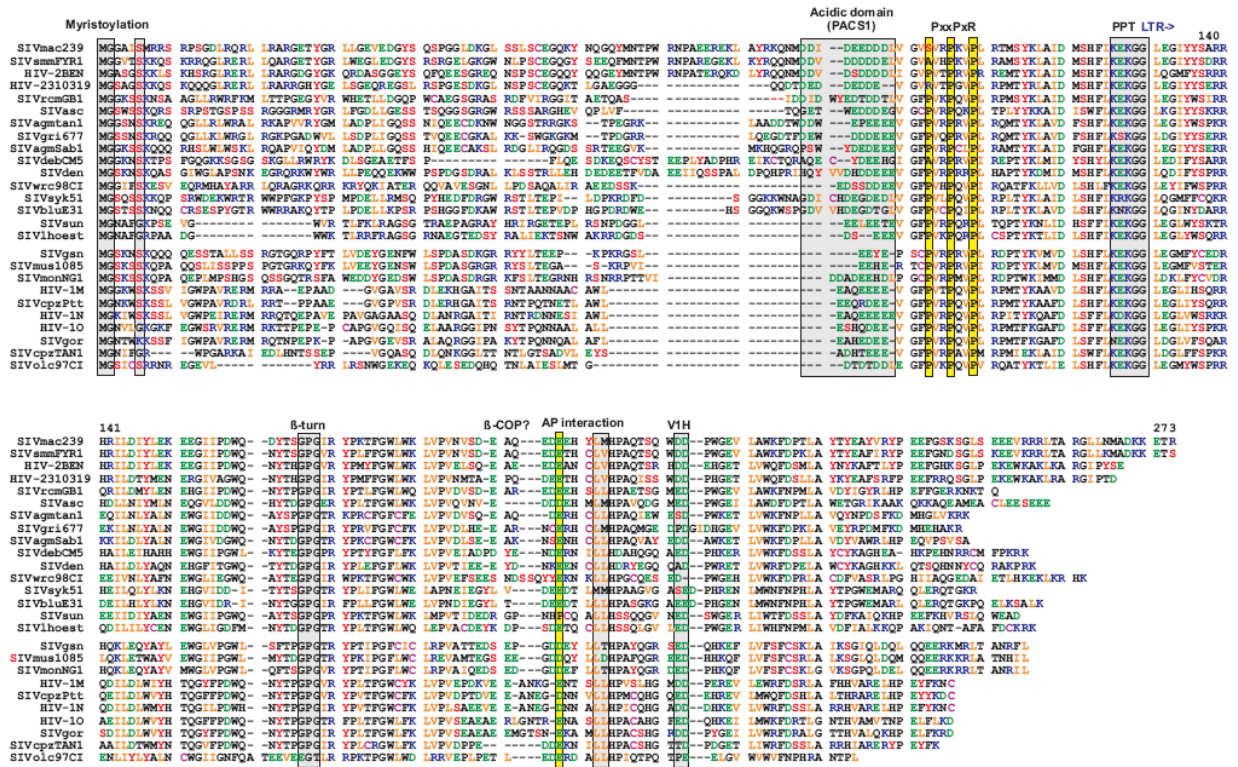

**FIG. S1.** Alignment of primate lentiviral Nef amino acid sequences. Sequences were grouped based on their ability to down-modulate TCR-CD3 (upper) or not (lower). Dashes indicate gaps introduced to optimize the alignment. Acidic residues (E, D) are highlighted in green, basic residues (K, R) in blue, hydrophobic residues (I, V, L) in orange and residues that can potentially be phosphorylated (S, T, Y) in red. Some conserved sequence elements in Nef, the position of the polyprotein tract (PPT), and the start of the 3' long terminal repeat (LTR) are indicated. VIH, catalytic subunit of vacuolar ATPase.
